# Supplementary material
Source: PubMed Central journal article supplement (PMC3073518)

**Same-sample comparison with  
reactions, labeling, hybridization, and  
scanning two months apart**

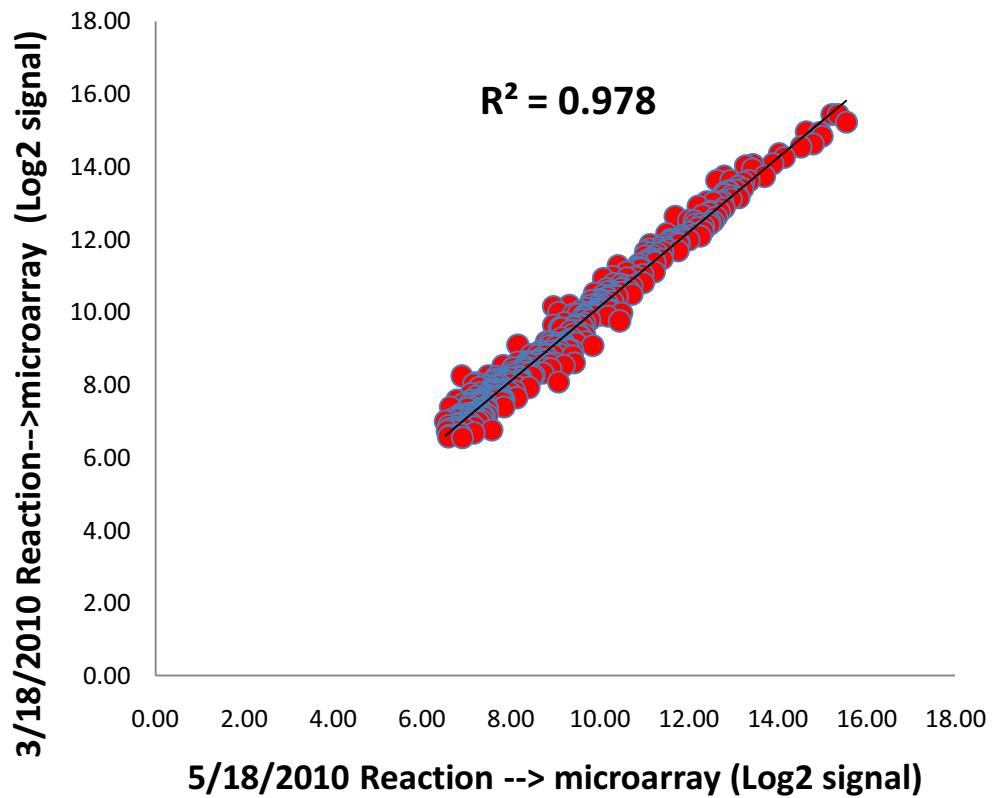

Supplement: NIHMS264562-supplement-2.pdf [file NIHMS264562-supplement-2.pdf]

(Ethidium bromide)  
Fr Cb Hi SN Te

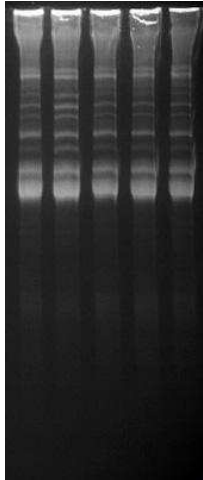

miR-32\* miR-551b miR-583 miR-665 miR-765

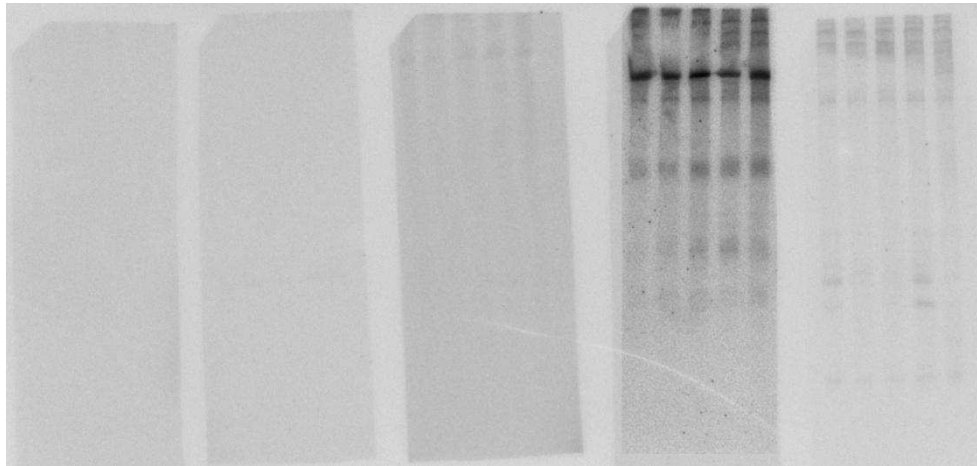

miR-1259 miR-1280 miR-1308 miR-1827 miR-1908 miR-124

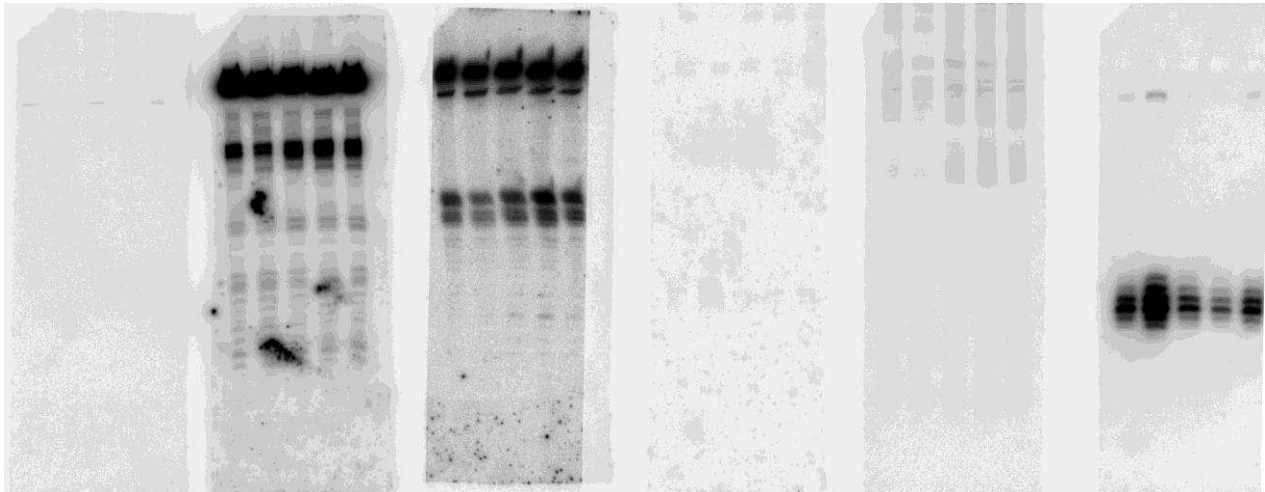

Supplement: NIHMS264562-supplement-3.pdf [file NIHMS264562-supplement-3.pdf]
